# Supplementary material for: Correction of recessive dystrophic epidermolysis bullosa by homology-directed repair-mediated genome editing
Source: PubMed Central journal article supplement — Mol Ther. 2021 Feb 18;29(6):2008–18. doi: 10.1016/j.ymthe.2021.02.019 (PMC8178438; doi:10.1016/j.ymthe.2021.02.019), 2021-02-18

## **Supplemental Information**

### **Correction of recessive dystrophic epidermolysis bullosa by homology-directed repair-mediated genome editing**

**Jose Bonafont, Angeles Mencía, Esteban Chacón-Solano, Wai Srifa, Sriram Vaidyanathan, Rosa Romano, Marta Garcia, Rosario Hervás-Salcedo, Laura Ugalde, Blanca Duarte, Matthew H. Porteus, Marcela Del Rio, Fernando Larcher, and Rodolfo Murillas**

**A**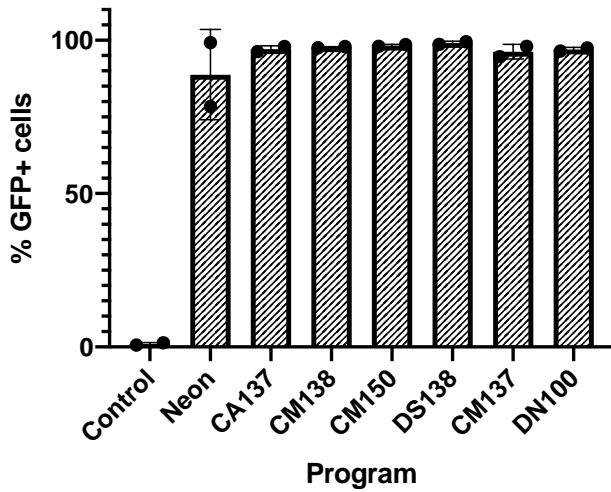**B**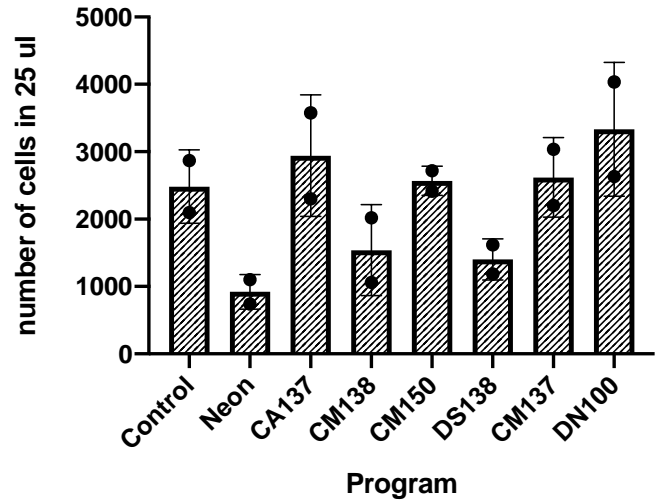**C**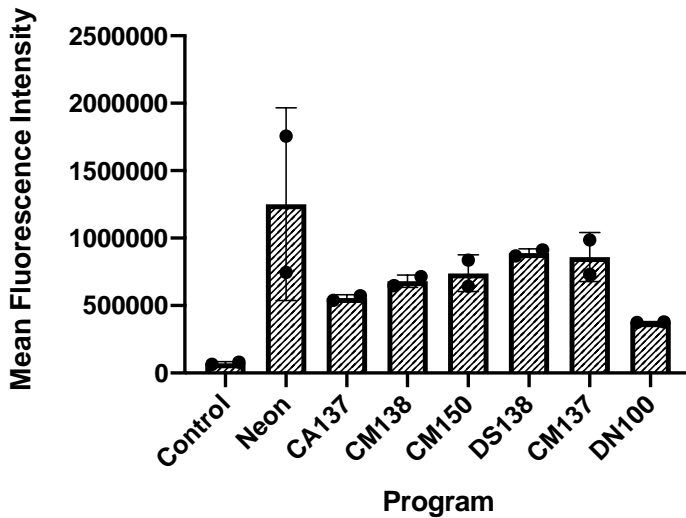

**Supplementary Figure 1. Optimization of electroporation conditions in primary RDEB keratinocytes.** A) Percentage of GFP-positive cells after GFP-mRNA electroporation with different programs and platforms. X axis, Neon and different 4D-Nucleofector™ System codes. B) Cell survival after electroporation. Cell number determined by flow cytometry 72h after treatment. C) GFP Mean Fluorescence Intensity for each electroporation condition.

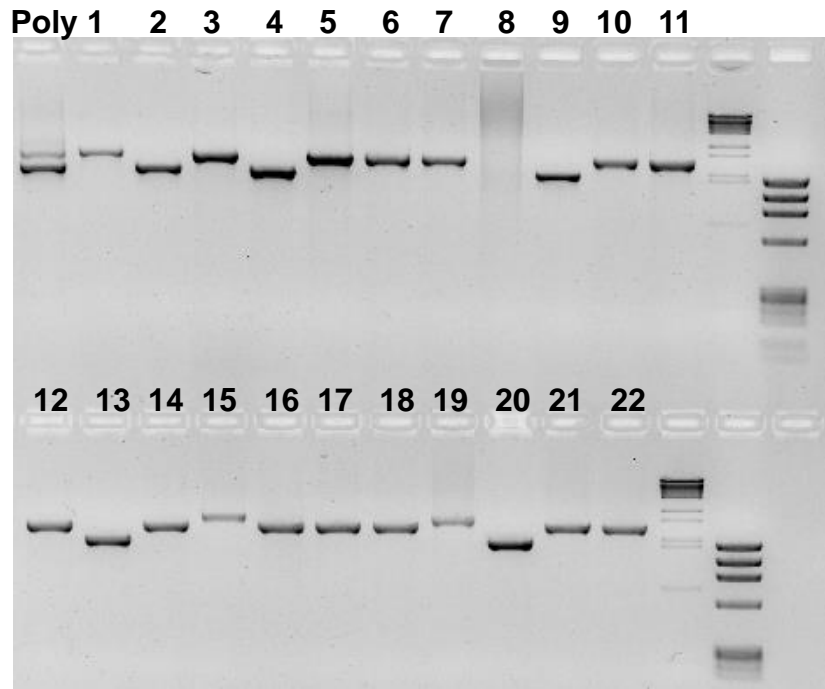

**Supplementary Figure 2. HDR PCR genotyping of isolated clones from treated primary P1 keratinocytes.** 22 clones are shown. Poly, bulk edited culture. All recombinant (5 out of 21, lower band) clones were bi-allelically corrected.

**C7****KI-67****Merged****P1**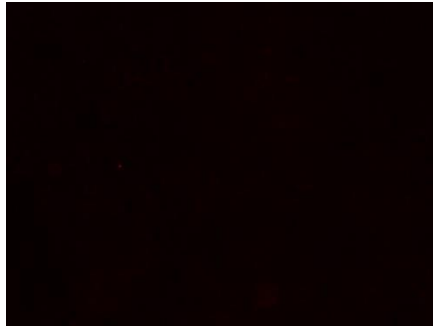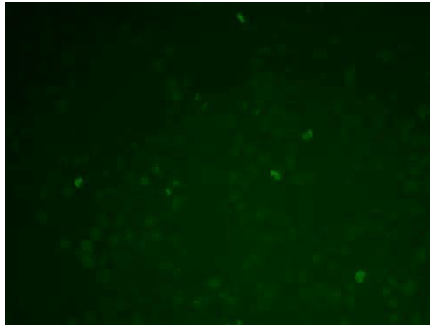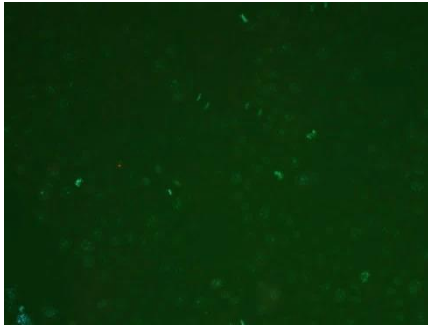**Co**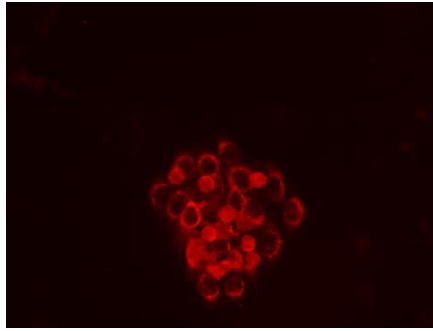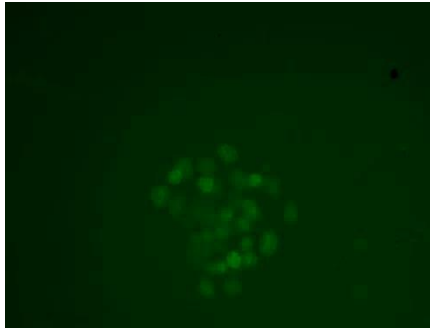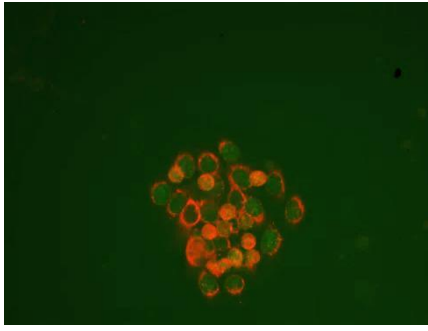**Sym**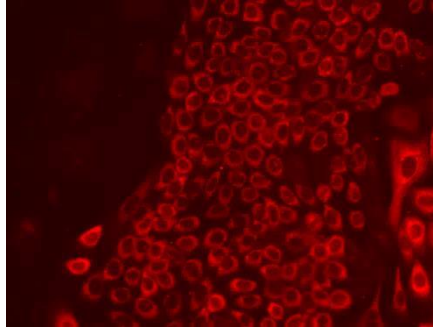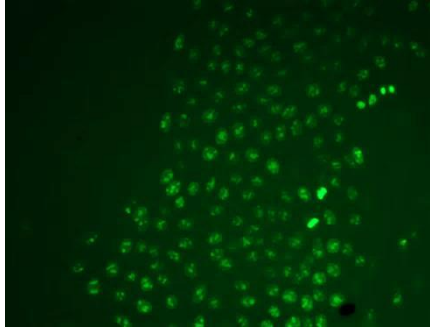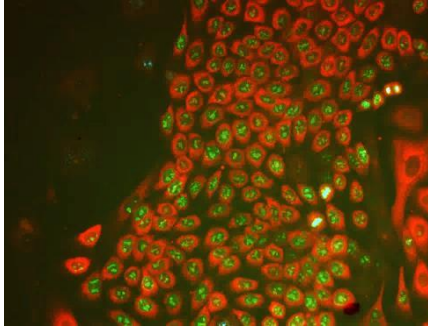**Asym**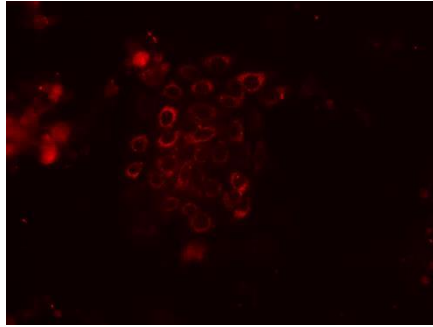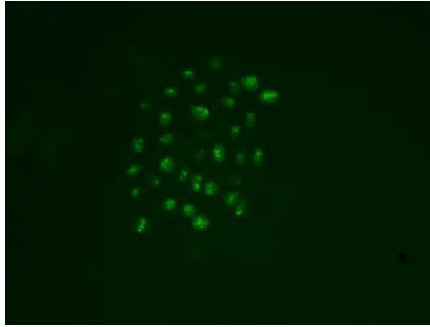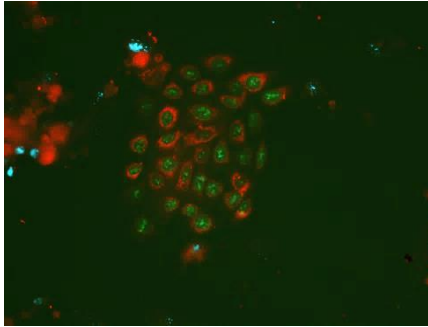

**Supplementary Figure 3. C7 restoration after HDR treatment in proliferative P1 keratinocytes.** C7 immunofluorescence (red) detection after genome editing treatment (Sym and Asym). KI67 immunostaining (green) shows proliferative status. Co, Normal Human Keratinocytes; P1, untreated patient keratinocytes.

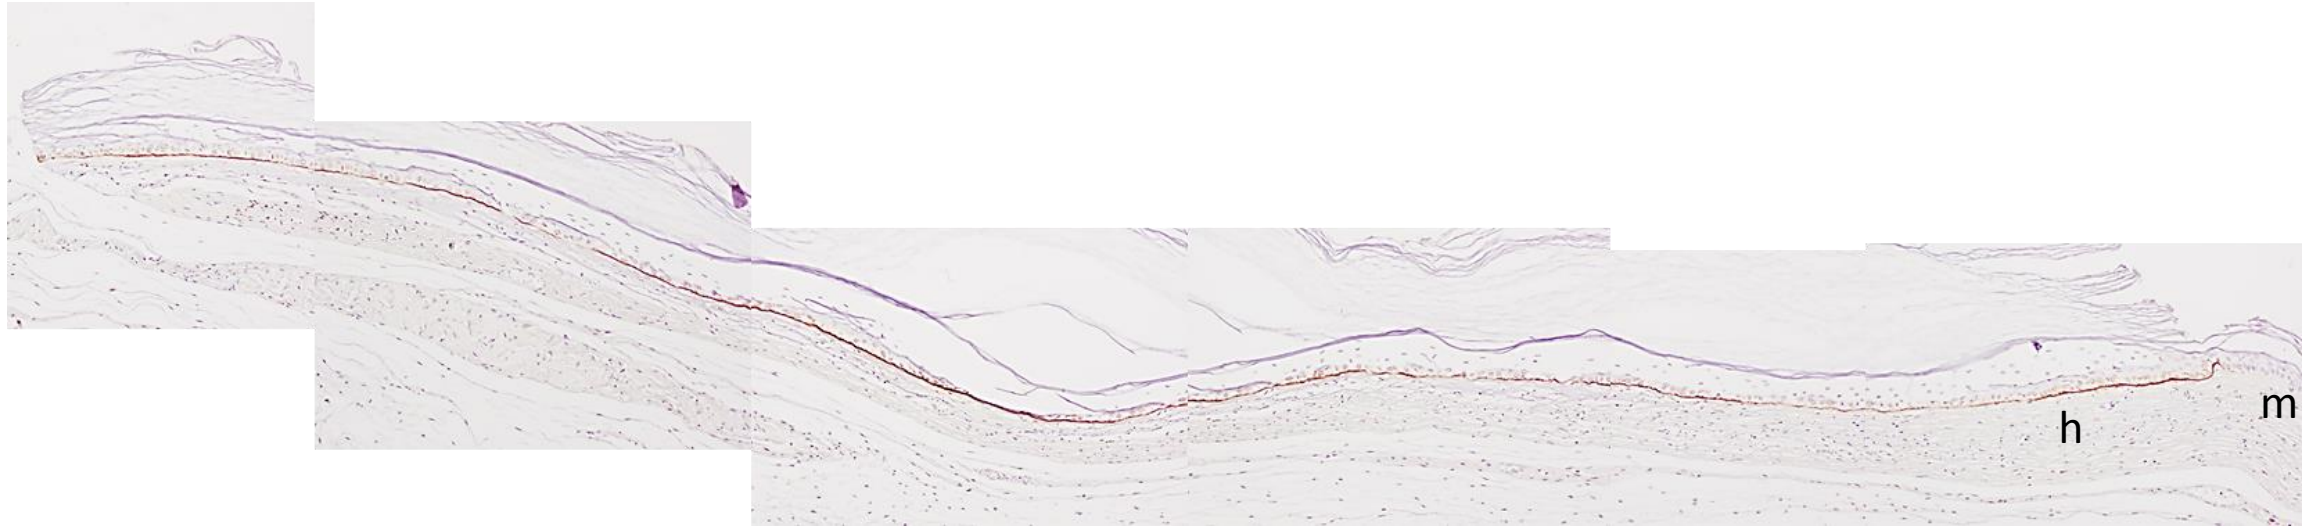

**Supplementary Figure 4. C7 Immunohistochemistry in grafts from gene-edited P1 keratinocytes.** Consecutive fields were assembled to show continuous C7 deposition along the BMZ throughout the human skin graft. h, human tissue; m, mouse tissue

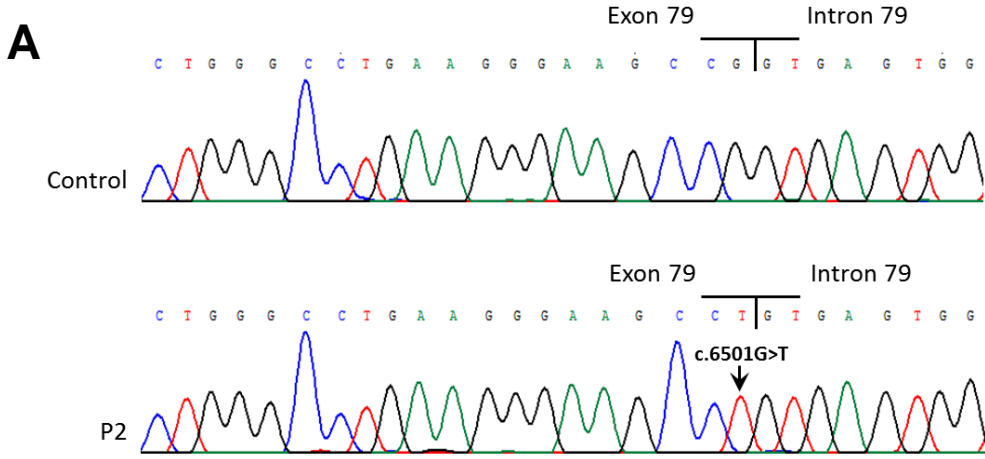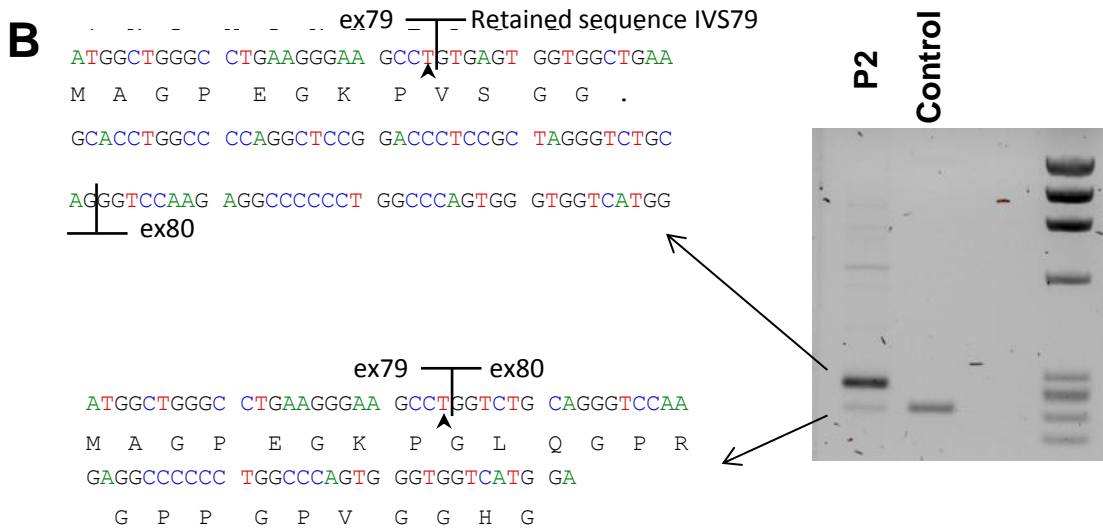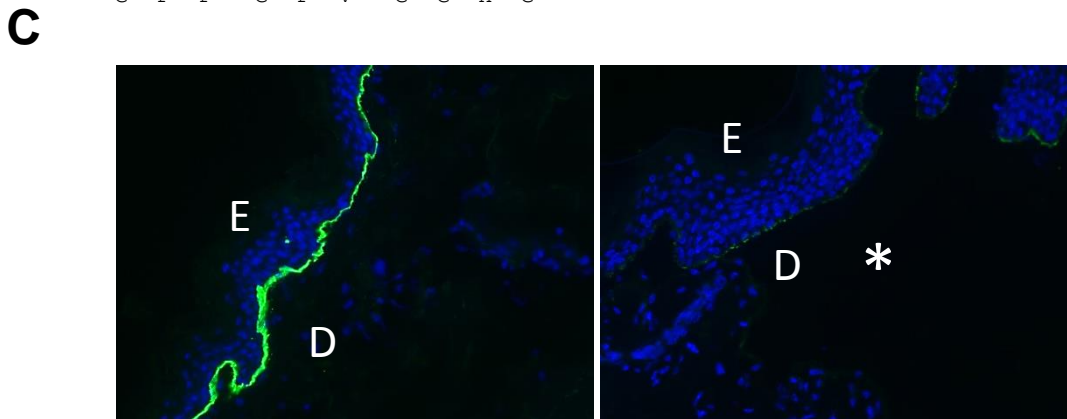

**Supplementary Figure 5. Patient P2 genotyping and C7 expression characterization.**

A) c. 6501G>T homozygous variation detected by Sanger sequencing of a PCR fragment spanning exon 79 and adjacent intronic regions. Control sequence shown for comparison. B) *COL7A1* transcription analysis. RT-PCR bands corresponding to exons 79-80 were cloned and sequenced. Splice donor alteration causes retention of a fragment of intron 79. The presence of the smaller band corresponding to the normal splice variant containing the c.6501G>T change indicates that this is a hypomorphic allele. C) Immunofluorescence detection of C7 in a frozen section of P2 skin. Very faint, dotted staining indicates greatly decreased C7 expression. Asterisk denotes blister. E, Epidermis; D, Dermis.

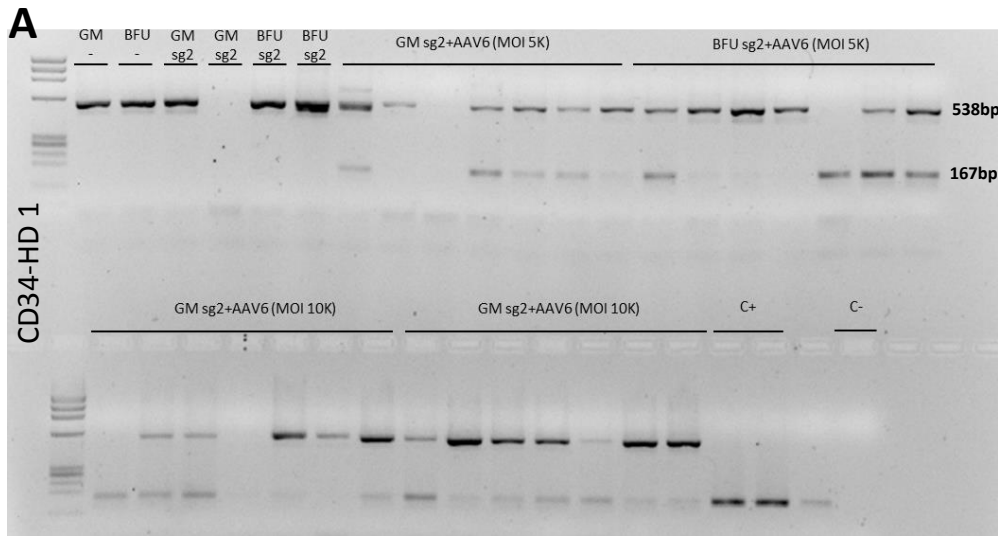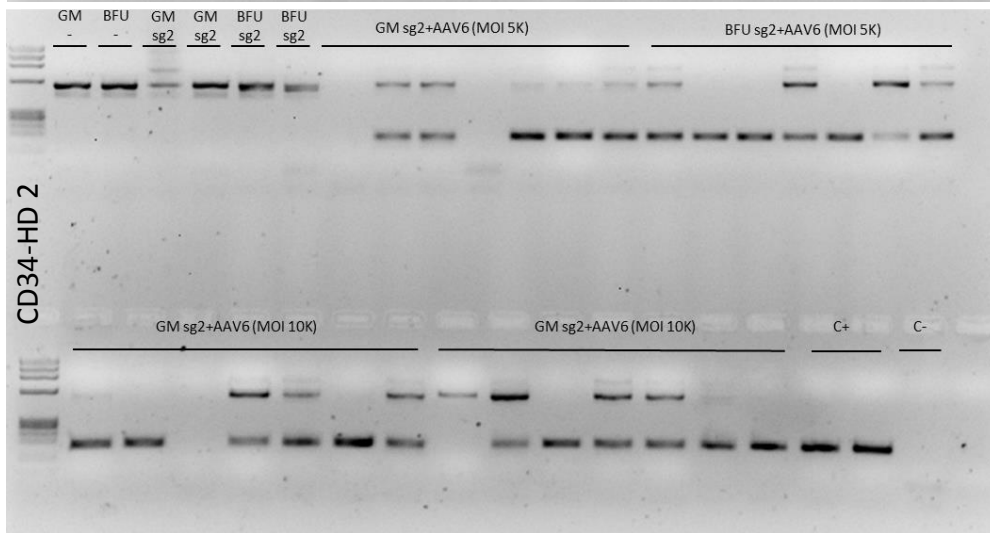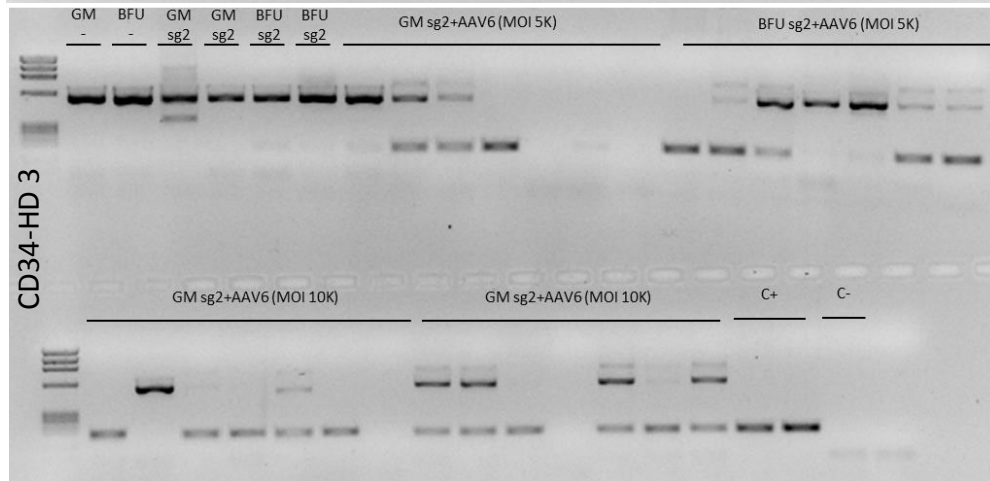

**Supplementary Figure 6. Analysis of individual colonies from methylcellulose clonal cultures from genome edited CD34+ cells.** A) PCR genotyping of edited human burst-forming unit erythroid (BFU) and colony-forming unit granulocyte-macrophage (GM) from three healthy different donors (CD34-HD 1-3). B) Colony Forming Units (CFU-GMs and CFU-BFUs) quantification in methylcellulose culture of edited CD34+ cells.

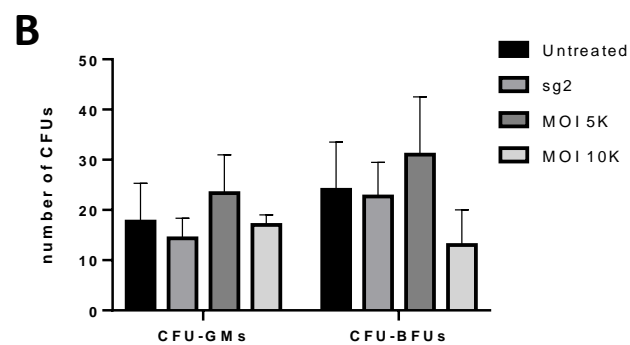

Supplement: mmc1.pdf [file mmc1.pdf]
